# Supplementary material for: Characterization and comparative analysis of the complete mitochondrial genome of Azygia hwangtsiyui Tsin, 1933 (Digenea), the first for a member of the family Azygiidae
Source: Zookeys. 2020 Jul 3;945:1–16. doi: 10.3897/zookeys.945.49681 (PMC7351859; doi:10.3897/zookeys.945.49681)
Supplement: Supplementary material 1 — Table S1 [file zookeys-945-001-s001.xls]

## Sheet: Primers
Fragment No.	Gene or region	Primer name	Sequence (5'-3')	Length (bp)
F1	cytb	HWF1	CTTCCATGACATCAGATGTCC	460
		HWR1	CTATTGAACGCAGCATCGCA
F2	cytb-nad4	HWF2	GTTTTTGGATGTCGAGAG	1089
		HWR2	CCAAAGGCTTAAACCACACC
F3	nad4	HWF3	GTTGTTGATTTTGGAGTCTC	565
		HWR3	ACCGGCAGAAAACCCATGAC
F4	nad4-nad1	HWF4	GTCCCATATATCTGTGGTTG	2498
		HWR4	GAAACCTTGAACTTAACCAC
F5	nad1	HWF5	TAGCGGAGCGTAAGGTGTTAG	744
		HWR5	CGTAACGCACACGAGGTAGA
F6	nad1-16S	HWF6	CTTGTCTTTTTGCTTGCGAG	3320
		HWR6	GCTCTCGGGGTCTTTCCGTC
F7	16S	HWF7	TTGACTGTGCTAAGGTAGCG	383
		HWR7	GTCTTAACTCAACTCATGAG
F8	16S-12S	HWF8	CACCTCGATGTTGACTTGG	546
		HWR8	CCTCCATATACTAGGGTATC
F9	12S	HWF9	CAGCAACTGCGGTTATTCTG	515
		HWR9	CTTTTCATAGCTAAGCACTGTG
F10	12S-cox2	HWF10	GGACTTGGAAGTAGTTGGG	568
		HWR10	CACAACATCCGAAGATGTAAC
F11	cox2	HWF11	GTATTGTTAAGATTGTTGGTC	279
		HWR11	GCTCGGTACAATAACCAACG
F12	cox2-cytb	HWF12	GCATTCGTTTAGGCTTCCGGAG	4582
		HWR12	AGCCAAACATATGTGAGCAG
