# Supplementary material for: Characterization and comparative analysis of the complete mitochondrial genome of Azygia hwangtsiyui Tsin, 1933 (Digenea), the first for a member of the family Azygiidae
Source: Zookeys. 2020 Jul 3;945:1–16. doi: 10.3897/zookeys.945.49681 (PMC7351859; doi:10.3897/zookeys.945.49681)
Supplement: Supplementary material 2 — Table S2 [file zookeys-945-001-s002.xls]

## Sheet: used_species
Taxon	Accession number	Whole Genome				Protein-coding genes(PCGs)				rRNA				tRNA				References
		Size(bp)	AT%	AT-Skew	GC-Skew	Size(bp)	AT%	AT-Skew	GC-Skew	Size(bp)	AT%	AT-Skew	GC-Skew	Size(bp)	AT%	AT-Skew	GC-Skew
Cyclophyllidea
Cyclophyllidea
Hymenolepididae
Cloacotaenia megalops	NC_032295.1	13887	71.6	-0.264	0.314	10065	71.3	-0.316	0.331	1681	72.2	-0.135	0.242	1404	70.5	-0.118	0.253	Guo 2016
Diphyllobothriidea
Diphyllobothriidea
Diphyllobothriidae
Dibothriocephalus latus	NC_008945.1	13608	68.2	-0.309	0.245	10071	68	-0.364	0.248	1708	69.1	-0.155	0.245	1418	66.6	-0.153	0.235	Radačovská et al.2019
N/A
Hemiuroidea
Azygiidae
Azygia hwangtsiyui	MN844889	13973	59.6	-0.437	0.408	10126	59.9	-0.509	0.425	1715	59.2	-0.253	0.303	1349	57	-0.238	0.328	this study
N/A
Gastrodiscidae
Homalogaster paloniae	NC_030530.1	15987	66	-0.298	0.474	10107	65.2	-0.407	0.473	758	64.2	-0.15	0.358	1459	62.7	-0.135	0.411	Yang et al.2016a
Opisthorchiida
Opisthorchiida
Heterophyidae
Haplorchis taichui	NC_022433.1	15130	59.3	-0.339	0.391	10176	60.1	-0.433	0.403	1726	57.4	-0.22	0.372	1422	57.2	-0.156	0.346	Lee et al.2013
Metagonimus yokogawai	NC_023249.1	15258	55.7	-0.361	0.359	10245	56	-0.453	0.348	1736	54.1	-0.264	0.344	1473	52.6	-0.215	0.312	Yang et al.2016
Opisthorchiidae
Clonorchis sinensis	NC_012147.2	13875	60.2	-0.426	0.379	10209	60.8	-0.484	0.394	1777	59.4	-0.236	0.336	1435	56.2	-0.228	0.332	Shekhovtsov et al.2010
Metorchis orientalis	NC_028008.1	13834	60.6	-0.479	0.395	10176	61.6	-0.531	0.404	1765	59	-0.318	0.345	1439	57.3	-0.278	0.319	Na et al.2016
Opisthorchis felineus	NC_011127.2	14277	59.8	-0.425	0.383	10218	60.6	-0.494	0.385	1773	58.4	-0.275	0.329	1452	56.2	-0.223	0.327	Shekhovtsov et al.2010
Opisthorchis viverrini	JF739555.1	13510	59.4	-0.43	0.361	10206	60.4	-0.487	0.378	1767	57.6	-0.229	0.302	1314	54.6	-0.22	0.305	Cai et al.2012
Plagiorchiida
Allocreadioidea
Brachycladiidae
Brachycladium goliath	NC_029757.1	15229	55.6	-0.486	0.458	10123	56.6	-0.583	0.429	1722	54.7	-0.279	0.399	1431	53.7	-0.269	0.405	Briscoe et al.2016
Echinostomatoidea
Echinochasmidae
Echinochasmus japonicus	NC_030518.1	15865	61.5	-0.432	0.464	10143	62.2	-0.497	0.484	1749	58.4	-0.218	0.376	1461	57.1	-0.272	0.393	Le et al.2016
Echinostomatidae
Artyfechinostomum sufrartyfex	NC_037150.1	14567	62.6	-0.389	0.432	10131	63.2	-0.462	0.442	1728	61.8	-0.2	0.339	1438	60.5	-0.219	0.358	Toledo & Fried 2014
Echinostoma hortense	NC_028010.1	14994	63.1	-0.323	0.342	10047	63.6	-0.418	0.362	1732	61.3	-0.174	0.333	1411	60.3	-0.142	0.329	Liu et al.2016
Echinostoma miyagawai	NC_039532.1	14416	65.3	-0.379	0.39	10134	65.6	-0.446	0.406	1763	63.6	-0.183	0.296	1434	62	-0.233	0.347	Li et al.2019
Echinostoma paraensei	KT008005.1	20298	47.2	-0.381	0.397	10155	65.6	-0.449	0.403	1748	63.7	-0.186	0.304	1434	63.2	-0.225	0.364	Li et al.2019
Hypoderaeum sp. Hubei-2014	KM111525.1	14180	61.4	-0.384	0.394	10422	62	-0.449	0.414	1730	59.8	-0.159	0.324	1443	60.1	-0.227	0.326	Yang et al.2015a
Fasciolidae
Fasciola gigantica	NC_024025.1	14478	62.7	-0.513	0.498	10107	63.9	-0.577	0.514	1757	61.5	-0.307	0.418	1414	59.3	-0.346	0.372	Liu et al.2014a
Fasciola hepatica	NC_002546.1	14462	62.2	-0.483	0.475	10104	63.5	-0.55	0.476	1753	62.3	-0.259	0.388	1420	57.9	-0.322	0.404	Liu et al.2014a
Fasciola jacksoni	KX787886.1	14952	61.6	-0.426	0.517	10137	61.7	-0.523	0.518	1743	62.9	-0.224	0.431	1414	59.8	-0.284	0.423	Liu et al.2014a
Fasciola sp. GHL-2014	KF543343.1	14453	62.6	-0.517	0.504	10107	63.9	-0.58	0.52	1755	61.5	-0.311	0.425	1413	59.2	-0.362	0.392	Ma et al.2016a
Fascioloides magna	NC_029481.1	14047	61.4	-0.432	0.465	10129	62	-0.503	0.489	1751	61.5	-0.244	0.377	1402	59.8	-0.272	0.394	Ma et al.2016a
Fasciolopsis buski	NC_030528.1	14833	65.1	-0.435	0.503	10122	65.6	-0.494	0.5	1764	64.7	-0.248	0.377	1422	62.5	-0.303	0.392	Biswal et al.2016
Himasthlidae
Acanthoparyphium sp. WAK-2018	MG792058.1	14191	61.8	-0.371	0.407	10119	62.1	-0.446	0.417	1726	61.4	-0.195	0.343	1379	60.3	-0.184	0.336	Le et al.2019
Gorgoderoidea
Dicrocoeliidae
Dicrocoelium chinensis	NC_025279.1	14917	62.1	-0.417	0.473	10042	62.2	-0.52	0.482	1675	59	-0.245	0.386	1385	57.6	-0.212	0.33	Liu et al.2014b
Dicrocoelium dendriticum	NC_025280.1	14884	62.2	-0.414	0.466	10042	62.4	-0.516	0.471	1677	59.3	-0.221	0.388	1375	57.4	-0.3	0.386	Liu et al.2014b
Eurytrema pancreaticum	KP241855.1	15031	62.4	-0.425	0.377	10161	63.4	-0.512	0.38	1746	60.4	-0.268	0.355	1420	58.7	-0.316	0.349	Chang et al.2016
Paramphistomoidea
Gastrothylacidae
Fischoederius cobboldi	NC_030529.1	14256	65	-0.376	0.469	10101	65.7	-0.446	0.493	1747	63.4	-0.162	0.419	1453	64.2	-0.168	0.388	Yang et al.2015b
Fischoederius elongatus	NC_028001.1	14120	63.9	-0.381	0.467	10155	64.6	-0.456	0.486	1746	61.5	-0.181	0.42	1432	63.5	-0.156	0.387	Le et al.2019
Gastrothylax crumenifer	NC_027833.1	14801	63.5	-0.376	0.46	10116	64.1	-0.453	0.459	1751	62.1	-0.181	0.419	1437	63.7	-0.158	0.375	Yang et al.2016b
Paramphistomidae
Calicophoron microbothrioides	NC_027271.1	14028	65.3	-0.371	0.479	10110	65.8	-0.451	0.501	1745	63.8	-0.126	0.39	1464	63.5	-0.156	0.366	Le et al.2019
Explanatum explanatum	NC_027958.1	13968	64.9	-0.384	0.482	10107	65.4	-0.459	0.497	1741	63.3	-0.17	0.417	1440	63.6	-0.16	0.38	Le et al.2019
Orthocoelium streptocoelium	NC_028071.1	13800	64.5	-0.389	0.51	10088	65.3	-0.464	0.531	1762	63.2	-0.165	0.435	1442	62.8	-0.163	0.425	Zhao et al.2016
Paramphistomum cervi	NC_023095.1	14014	63.4	-0.418	0.503	10104	63.7	-0.497	0.517	1740	62.4	-0.199	0.446	1438	62.2	-0.196	0.403	Yan et al.2013
Plagiorchiida
Troglotrematidae
Paragonimus heterotremus	NC_039430.1	13927	58.4	-0.431	0.364	10101	58.8	-0.492	0.372	1711	57.9	-0.281	0.34	1458	57	-0.249	0.273	Qian et al.2018
Paragonimus ohirai	NC_032032.1	14818	62.2	-0.38	0.41	10104	63	-0.46	0.415	1710	60.1	-0.237	0.349	1456	58.3	-0.211	0.311	Le et al.2019
Paragonimus westermani complex sp. type 1	NC_027673.1	14103	54.4	-0.4	0.324	10104	54.7	-0.463	0.317	1729	55.3	-0.269	0.337	1435	53.9	-0.22	0.307	Biswal et al.2014
Paragonimus westermani	NC_002354.2	14965	51.7	-0.395	0.295	10029	51.6	-0.482	0.261	987	52.1	-0.266	0.284	2589	52	-0.368	0.292	Biswal et al.2014
Pronocephaloidea
Notocotylidae
Ogmocotyle sikae	NC_027112.1	14307	66.5	-0.324	0.478	10113	66	-0.409	0.5	1748	67.4	-0.127	0.404	1456	65.7	-0.142	0.388	Ma et al.2016b
Ogmocotyle sp. JM-2015	KR006935.1	14001	64.1	-0.356	0.463	10110	63.8	-0.43	0.476	1743	65.2	-0.15	0.407	1477	64.9	-0.135	0.386	Olson 2003
Strigeidida
Clinostomoidea
Clinostomidae
Clinostomum complanatum	NC_027082.1	13796	64.3	-0.355	0.403	10170	64.6	-0.433	0.426	1743	64.3	-0.141	0.313	1420	62.1	-0.154	0.309	Chen et al.2016
Diplostomoidea
Cyathocotylidae
Cyathocotyle prussica	NC_039780.1	13665	65.3	-0.308	0.397	10176	66	-0.37	0.406	1727	63.4	-0.1	0.36	1421	61.2	-0.122	0.318	Le et al.2019
Schistosomatoidea
Schistosomatidae
Schistosoma haematobium	NC_008074.1	15003	72.4	-0.197	0.423	10110	72.7	-0.238	0.433	1817	67.2	-0.088	0.349	1502	69.5	-0.128	0.314	Littlewood et al.2006
Schistosoma japonicum	NC_002544.1	14085	71	-0.299	0.422	10107	71.3	-0.355	0.445	1748	68.4	-0.126	0.309	1539	68.5	-0.163	0.348	Littlewood et al.2006
Schistosoma mansoni	NC_002545.1	14415	68.5	-0.26	0.458	10035	68.9	-0.321	0.479	1807	67.5	-0.088	0.382	1556	66	-0.116	0.361	Littlewood et al.2006
Schistosoma mekongi	NC_002529.1	14072	72.2	-0.281	0.484	10179	72.7	-0.332	0.508	1728	68.3	-0.13	0.349	1478	70	-0.129	0.372	Littlewood et al.2006
Schistosoma spindale	NC_008067.1	16901	72.7	-0.159	0.482	10092	73.3	-0.236	0.474	1816	67.4	-0.049	0.382	1480	71.2	-0.079	0.297	Littlewood et al.2006
Trichobilharzia regenti	NC_009680.1	14838	68.5	-0.358	0.512	10041	68.4	-0.433	0.521	1788	68.2	-0.189	0.366	1521	66.1	-0.183	0.386	Bonnie et al.2007
Trichobilharzia szidati	NC_036411.1	14293	67.9	-0.379	0.495	10026	67.7	-0.435	0.514	1798	66.8	-0.227	0.37	1484	66.4	-0.199	0.382	Semyenova et al.2017
N/A, not available; PCGs, protein coding genes; rRNA, ribosomal RNA; tRNA, transfer RNA; bp, base pair.
