# Supplementary material for: Characterization and comparative analysis of the complete mitochondrial genome of Azygia hwangtsiyui Tsin, 1933 (Digenea), the first for a member of the family Azygiidae
Source: Zookeys. 2020 Jul 3;945:1–16. doi: 10.3897/zookeys.945.49681 (PMC7351859; doi:10.3897/zookeys.945.49681)
Supplement: Supplementary material 3 — Table S3 [file zookeys-945-001-s003.xls]

## Sheet: AT content
Gene	Homalogaster paloniae	Metorchis orientalis	Acanthoparyphium sp. WAK-2018	Paragonimus westermani complex sp. type 1	Schistosoma mekongi	Haplorchis taichui	Ogmocotyle sikae	Clinostomum complanatum	Metagonimus yokogawai	Echinostoma miyagawai	Clonorchis sinensis	Paragonimus ohirai	Fasciola sp. GHL-2014	Gastrothylax crumenifer	Ogmocotyle sp. JM-2015	Paragonimus westermani	Artyfechinostomum sufrartyfex	Orthocoelium streptocoelium	Eurytrema pancreaticum	Paragonimus heterotremus	Explanatum explanatum	Fischoederius cobboldi	Cloacotaenia megalops	Echinostoma hortense	Dicrocoelium chinensis	Dicrocoelium dendriticum	Trichobilharzia szidati	Azygia hwangtsiyui	Opisthorchis felineus	Calicophoron microbothrioides	Cyathocotyle prussica	Schistosoma japonicum	Schistosoma haematobium	Hypoderaeum sp. Hubei-2014	Echinostoma paraensei	Fasciolopsis buski	Dibothriocephalus latus	Echinochasmus japonicus	Brachycladium goliath	Trichobilharzia regenti	Fasciola gigantica	Paramphistomum cervi	Fascioloides magna	Fischoederius elongatus	Opisthorchis viverrini	Schistosoma spindale	Fasciola jacksoni	Fasciola hepatica	Schistosoma mansoni
atp6	63.2	59.3	63	54.9	75.7	61.6	66.9	65.3	56.4	68	61.3	62.5	64.1	65.5	63.5	51.5	61.7	64.9	65.1	58.5	67	67	71.3	63.9	63.4	62.2	68.1	63.4	59.9	66.7	63.6	69.8	76	62.6	64.5	65.7	67.8	62	57.2	69.2	63.2	66.1	61.1	65.5	61.6	72.8	60.9	63.4	68.4
cox1	63.3	59.6	61.7	55.6	69.2	59.6	64.4	64.3	55.1	63.6	59.2	61.5	63.8	63.8	61.9	51.7	62.3	63.7	60.8	58.6	63.7	64.5	67.9	62.6	61.2	61.2	66	59.9	60.5	63.2	65.5	67.4	70.3	60.5	62.9	63.3	68.1	62.4	56.9	64.4	63.5	61.6	61.6	64.5	59.5	68.9	61.1	63	67.2
cox2	63.1	58.9	60.2	54.9	71.4	57.4	62.2	62.3	55.4	63.7	59.6	62.8	63.7	61.2	62.4	51	62.4	61.4	60.7	58.2	64.3	63.2	67.7	63.4	62.2	60.4	65.3	57.7	55.7	62.6	63	69.1	70.5	60.2	63.5	63.3	65.1	58.8	55.1	66.3	63.9	61.1	59.7	61.5	57.8	71.7	61.2	62.4	70.2
cox3	69.9	62.5	62.8	57.4	73.9	59.8	66.5	63.5	56	66.2	60.4	64.3	67.1	67.1	65.3	53.3	66	67.6	62.9	62.2	66.4	69.3	71.9	65.4	62.7	62.1	70.5	60.7	59.7	67.3	69.7	71.8	73.5	59.9	67.4	66.3	68	62.5	54.2	69.6	67.7	65.1	63.7	67	59.7	76.6	63.3	64.8	71.6
cytb	64.9	61.8	61.4	54.5	72.3	59.2	66.7	63.2	56.8	64.6	62	63.7	63	64.2	63.7	52	63.9	65.9	63.8	59.7	64.9	64.7	71	64.3	62.5	62.9	68.2	60.2	58.6	66.3	65.1	71.2	72	63.7	65.3	64.9	67.3	61.2	54.9	68.7	62.9	62.8	61.5	64.8	61.7	73.2	61.5	62	69.3
nad1	64.5	59.8	61.6	54.6	71.9	60.2	65	66.6	56.6	66	62.2	62.3	62.7	63.2	63.6	50.6	62.9	65.4	63.7	59.3	64.5	66	70.2	64.3	61.2	61.9	67.8	60.3	60.4	65.8	65.5	70.4	71.4	61.9	67.2	65.8	67.1	61.5	55.7	68	63.4	63.3	61.2	64.3	61.5	73.3	61.4	65.1	68.7
nad2	67.8	65.2	63.4	51	75	61.1	68.5	68	56.9	67.2	62.8	65.2	64.6	65.7	65	52.5	63.5	67.4	66.1	59.8	67.9	68.3	73.7	65.3	62.9	64.9	69.7	58	63.4	67.9	69.7	72.7	73.5	62.7	67.9	69	69.5	63.6	58.8	70.5	66.2	66.8	63.9	66.9	61.7	76.5	63.8	66	68
nad3	68.6	63	66.4	60	75.2	63.1	68.9	70.3	56.8	70.3	64.7	65	65.8	64	67.8	54.9	67.3	66	66.7	61	70	67.8	74	66.4	65.9	64.5	69.5	60	63.8	66.1	67.5	76.7	77.5	68.6	69.7	70.3	71.2	66.1	61.6	71.4	65.8	65.2	64.5	64.2	63	79.4	65.8	66.6	73.6
nad4	65.6	61.5	59.6	52.7	72.5	59.4	64.7	62.7	53.8	65.5	59.9	61.3	63.4	64	64.4	48.7	62.3	65.2	62.5	55.4	66.3	65.9	73.1	61.2	62.6	61.4	66	58	62	67.4	64.4	71.2	73.1	60.1	64.9	65	68.7	61.5	56.1	66.5	62.8	64.2	61.7	65	60.4	72.7	59.8	62.7	68.8
nad4L	67.4	64.8	67.1	58.2	75.8	63.2	68.9	65.3	61.8	68.9	64.8	65.1	65.6	67.1	68.2	54.7	65.2	68.2	64.8	60.2	66.7	64.8	76.2	67.7	63.2	61.4	71.3	64.8	63.6	69	69.9	72.4	75.5	64.5	68.5	68.1	73.2	62.6	55.7	71.3	65.2	64.4	60.9	66.3	63.2	76.8	64.8	65.9	73.2
nad5	63.9	62.3	62.3	55.3	72.6	59.7	66.6	64.2	54.9	65.5	59.3	63.3	63.9	63.1	62.1	51.5	63.5	65.2	62.9	58.4	64.1	63.8	71.6	63.5	61.6	62.1	67	60.5	60.2	65.6	65.7	73.4	71.7	63.4	65.9	65.3	66.4	62.9	57.1	69.6	63.4	64.1	62.1	62.9	58.4	72.8	61.4	62.1	66.5
nad6	66.7	65	65.1	52.1	75.8	63.2	67.1	65.7	59.8	65.1	60.8	62.9	63.1	64.5	65.1	52.5	60.7	64.9	68.2	60.1	65.4	66.4	73.3	61.8	62.9	66.9	71.8	60.1	63.6	65.1	67.3	75	78.3	60.7	65.8	67.5	69.8	63.2	59.1	74.8	64	64	63.4	63.3	61	77.8	61.1	64.7	71.7
